# Supplementary material
Source: publisher figshare collection journal article supplement (https://frontiersin.figshare.com/ndownloader/files/28188699)
Supplement: Supplementary file [file 28188699]

FIGURE S2 is available on <https://figshare.com/s/dae756a6f226a668db28>

**FIGURE S2.** Three-dimensional model of the interaction between the heterodimer of HLA-DRA1\*01:01/HLA-DRB1\*04:06 and S enantiomer of monohydroxy derivative of oxcarbazepine.
